# Supplementary material for: Lifetime reproductive success is maximized with optimal major histocompatibility complex diversity
Source: PubMed Central journal article supplement (PMC2664370; doi:10.1098/rspb.2008.1466), 2008-11-25
Supplement: rspb20081466s49.pdf [file rspb20081466s49.pdf]

**Supplementary Table 2:** Multiple primer PCR protocols used for microsatellite typing.

| PCR 1                |             | PCR2                  |             | PCR3                 |             | PCR4                 |             | PCR5                 |             |
|----------------------|-------------|-----------------------|-------------|----------------------|-------------|----------------------|-------------|----------------------|-------------|
| 10 x buffer          | 1.00        | 10 x buffer           | 1.00        | 10 x buffer          | 1.00        | 10 x buffer          | 1.00        | 10 x buffer          | 1.00        |
| dNTP's               | 1.00        | dNTP's                | 1.00        | dNTP's               | 1.00        | dNTP's               | 1.00        | dNTP's               | 1.00        |
| % BSA                | 1.00        | 1 % BSA               | 1.00        | MgCl <sub>2</sub>    | 0.30        | MgCl <sub>2</sub>    | 0.30        | MgCl <sub>2</sub>    | 0.30        |
| MgCl <sub>2</sub>    | 0.30        | MgCl <sub>2</sub>     | 0.30        | <b>STN 2 f</b>       | 0.30        | <b>STN 36 f</b>      | 0.30        | <b>STN 24 f</b>      | 0.30        |
| <b>Stich 5196 f</b>  | 0.10        | <b>Stich STN18 f</b>  | 0.12        | <b>STN 2 r</b>       | 0.30        | <b>STN 36 r</b>      | 0.30        | <b>STN 24 r</b>      | 0.30        |
| <b>Stich 5196 r</b>  | 0.10        | <b>Stich STN18 r</b>  | 0.12        | <b>STN 170 f</b>     | 0.30        | <b>STN 114 f</b>     | 0.30        | <b>STN 67 f</b>      | 0.25        |
| <b>Stich 4170 f</b>  | 0.08        | <b>Stich STN32 f</b>  | 0.08        | <b>STN 170 r</b>     | 0.30        | <b>STN 114 r</b>     | 0.30        | <b>STN 67 r</b>      | 0.25        |
| <b>Stich 4170 r</b>  | 0.08        | <b>Stich STN32 r</b>  | 0.08        | <b>STN 174 f</b>     | 0.30        | <b>STN 167 f</b>     | 0.45        | <b>STN 185 f</b>     | 0.30        |
| <b>Stich 1125 f</b>  | 0.10        | <b>Stich STN75 f</b>  | 0.17        | <b>STN 174 r</b>     | 0.30        | <b>STN 167 r</b>     | 0.45        | <b>STN 185 r</b>     | 0.30        |
| <b>Stich 1125 r</b>  | 0.10        | <b>Stich STN75 r</b>  | 0.17        | <b>Taq (Invitek)</b> | 0.05        | <b>Taq (Invitek)</b> | 0.05        | <b>Taq (Invitek)</b> | 0.05        |
| <b>Stich 1097 f</b>  | 0.40        | <b>Stich STN 84 f</b> | 0.08        | Water                | <u>4.85</u> | Water                | <u>4.55</u> | Water                | <u>4.95</u> |
| <b>Stich 1097 r</b>  | 0.40        | <b>Stich STN 84 r</b> | 0.08        |                      |             |                      |             |                      |             |
| <b>Stich 7033 f</b>  | 0.35        | <b>Taq (Invitek)</b>  | 0.05        |                      |             |                      |             |                      |             |
| <b>Stich 7033 r</b>  | 0.35        | Water                 | <u>4.75</u> |                      |             |                      |             |                      |             |
| <b>Taq (Invitek)</b> | 0.05        |                       |             |                      |             |                      |             |                      |             |
| Water                | <u>3.59</u> |                       |             |                      |             |                      |             |                      |             |

All quantities are in  $\mu$ l. The colors represent the label used. Working concentration of the primers: 5 pmol.

**Supplementary Table 3: PCR conditions and cycles for each multiple PCR performed**

|                       | PCR 1         | PCR2             | PCR3             | PCR4             | PCR5             |
|-----------------------|---------------|------------------|------------------|------------------|------------------|
| Original Denaturation | 3 min at 94°C | 3 min at 94°C    | 2 min at 94°C    | 2 min at 94°C    | 2 min at 94°C    |
| <b>Denaturation</b>   | 1 min at 94°C | 0.45 min at 94°C | 0.45 min at 94°C | 0.45 min at 94°C | 0.45 min at 94°C |
| <b>Annealing</b>      | 1 min at 58°C | 0.45 min at 56°C | 0.45 min at 56°C | 0.45 min at 56°C | 0.45 min at 56°C |
| <b>Extension</b>      | 1 min et 72°C | 1 min at 72°C    | 0.45 min at 72°C | 0.45 min at 72°C | 0.45 min at 72°C |
| Final extension       | None          | none             | 20 min at 72°C   | 20 min at 72°C   | 20 min at 72°C   |
| Number of cycle       | 27            | 26               | 27               | 27               | 27               |

In bold the conditions for each cycle
