# Supplementary material for: Lifetime reproductive success is maximized with optimal major histocompatibility complex diversity
Source: PubMed Central journal article supplement (PMC2664370; doi:10.1098/rspb.2008.1466), 2008-11-25
Supplement: rspb20081466s50.pdf [file rspb20081466s50.pdf]

**Supplementary Table 4:** Table summarizing the prevalence (percentage of infected hosts) and the mean intensity (number of parasite individuals of a given species per infected host) of all recorded parasites in the 53 dissected fish.

|                                            | Prevalence (%) | Mean Intensity |
|--------------------------------------------|----------------|----------------|
| <b>Protozoa:</b>                           |                |                |
| <i>Trichodina sp.</i>                      | 88.46          | 18.62          |
| <i>Apiosoma sp.</i>                        | 9.62           | 5.50           |
| <i>Ichthyophthirius multifiliis</i>        | 11.54          | 2.33           |
| <b>Monogenea:</b>                          |                |                |
| <i>Gyrodactylus sp.</i>                    | 28.85          | 17.80          |
| <b>Digenea:</b>                            |                |                |
| <i>Diplostomum sp. (total)</i>             | 100.00         | 15.98          |
| <i>D. pseudospathaceum (lab infection)</i> | 100.00         | 5.06           |
| <i>Cyathocotyle prussica</i>               | 98.08          | 4.35           |
| <i>Echinochasmus sp.</i>                   | 98.08          | 4.83           |
| <i>Apatemon cobitidis</i>                  | 71.15          | 4.70           |
| <i>Tylodelphis clavata</i>                 | 98.08          | 6.93           |
| <i>Phyllodistomum folium</i>               | 25.00          | 3.75           |
| <b>Cestoda:</b>                            |                |                |
| <i>Valipora campylancristrota</i>          | 84.62          | 11.93          |
| <i>Proteocephalus filicolis</i>            | 86.54          | 6.87           |
| <b>Nematoda:</b>                           |                |                |
| <i>Anguillicola crassus</i>                | 69.23          | 1.64           |
| <i>Contraecaecum sp.</i>                   | 13.46          | 1.00           |
| <i>Camallanus lacustris</i>                | 86.54          | 4.33           |
| <i>Raphidascaaris acus</i>                 | 71.15          | 2.97           |
| <b>Acanthocephala:</b>                     |                |                |
| <i>Acanthocephalus clavula</i>             | 34.62          | 2.00           |
| <i>Acanthocephalus lucii</i>               | 78.85          | 1.00           |
| <b>Crustacea:</b>                          |                |                |
| <i>Argulus foliaceus</i>                   | 15.38          | 1.91           |
| <i>Ergasilus sp.</i>                       | 9.62           | 1.00           |
| <b>Mollusca:</b>                           |                |                |
| Glochidia                                  | 23.08          | 1.00           |
