# Supplementary material for: Lifetime reproductive success is maximized with optimal major histocompatibility complex diversity
Source: PubMed Central journal article supplement (PMC2664370; doi:10.1098/rspb.2008.1466), 2008-11-25

**Supplementary Fig. 3:** Graph representing the mean intensity of the red colouration of males' throat in relation with individual parasite load. P value of the correlation is indicated on the graph.

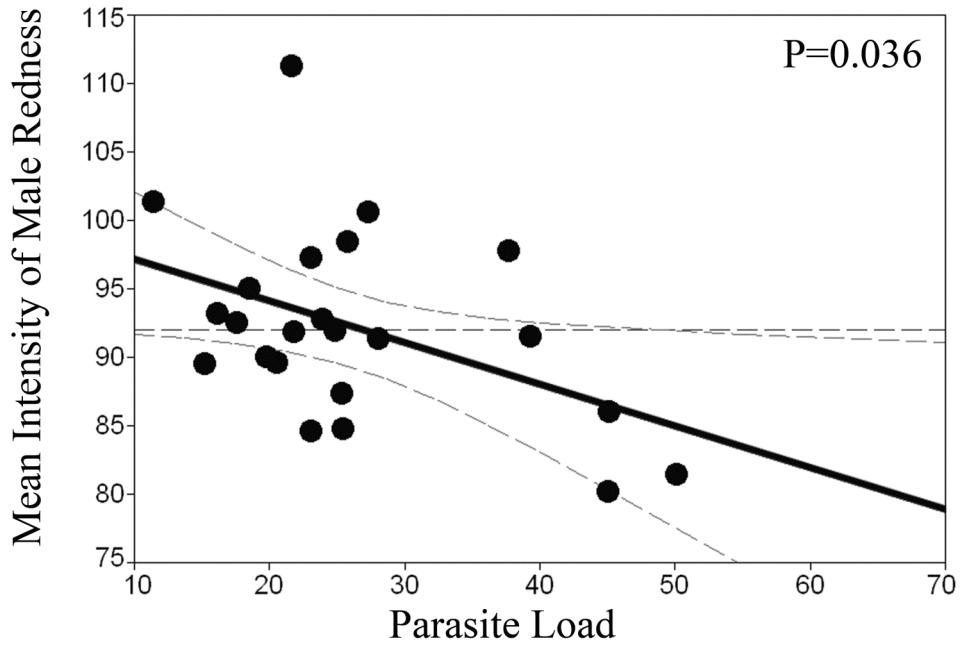

**Supplementary Fig. 4:** Representation of the correlation between male breeding colouration and standardized final body condition. P value of the correlation is indicated on the graph.

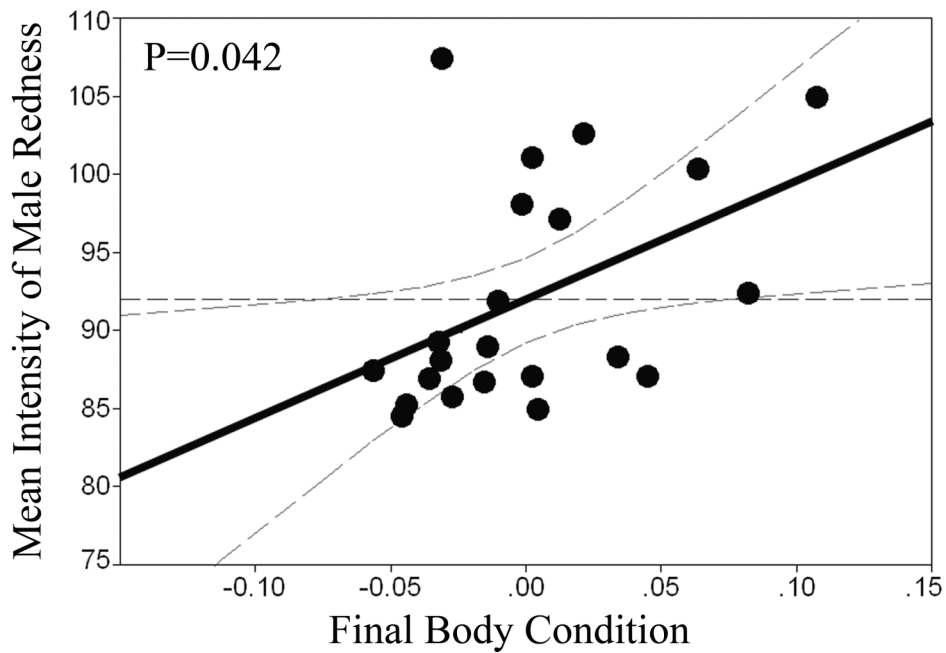

Supplement: rspb20081466s52.pdf [file rspb20081466s52.pdf]
